# Supplementary material for: Safety and tolerability of BAN2401 - a clinical study in Alzheimer’s disease with a protofibril selective Aβ antibody
Source: Springer Nature journal article supplement (doi:10.1186/s13195-016-0181-2), 2016-03-31
Supplement: MOESM1 [file 10028188]

**Table 2A. MAD 1-3 Safety Procedures**

| <b>MAD 1-3</b>                                             |                         |                 |    |                      |   |      |    |      |    |    |    |    |                |
|------------------------------------------------------------|-------------------------|-----------------|----|----------------------|---|------|----|------|----|----|----|----|----------------|
| <b>Phase</b>                                               | <b>Prerandomization</b> |                 |    | <b>Randomization</b> |   |      |    |      |    |    |    |    |                |
| <b>Period</b>                                              | <b>Screening</b>        | <b>Baseline</b> |    | <b>Treatment</b>     |   |      |    |      |    |    |    |    |                |
| <b>Visit</b>                                               | 1                       | 2               | 3  | 4                    | 5 | 6    | 7  | 8    | 9  | 10 | 11 | 12 |                |
| <b>Day</b>                                                 | -60 to -5               | -2              | -1 | 1                    | 2 | 21±2 | 28 | 49±2 | 56 | 83 | 84 | 85 | 175±5          |
| <b>Procedures/Assessments</b>                              |                         |                 |    |                      |   |      |    |      |    |    |    |    |                |
| MRI                                                        | X                       |                 |    |                      |   | X    |    | X    |    | X  |    |    | X              |
| Vital signs                                                | X                       | X               |    | X                    | X | X    | X  | X    | X  | X  | X  | X  | X              |
| Physical Exam                                              | X                       | X               |    | X                    |   | X    | X  | X    | X  | X  |    |    | X              |
| ECG                                                        | X                       | X               |    | X                    | X |      | X  |      | X  |    | X  |    | X <sup>w</sup> |
| Clinical labs (hematology, clinical chemistry, urinalysis) | X                       |                 | X  | X                    | X | X    | X  | X    | X  |    | X  | X  | X              |
| C-SSRS                                                     | X                       | X               |    |                      | X | X    | X  | X    | X  |    | X  | X  | X              |
| Adverse events                                             | X                       | X               | X  | X                    | X | X    | X  | X    | X  | X  | X  | X  | X              |

**Table 3A. MAD4 Safety Procedures**

| <b>MAD4</b>                                                       |                         |                 |    |                      |   |    |    |    |    |    |    |    |    |    |    |    |    |    |                               |                    |   |
|-------------------------------------------------------------------|-------------------------|-----------------|----|----------------------|---|----|----|----|----|----|----|----|----|----|----|----|----|----|-------------------------------|--------------------|---|
| <b>Phase</b>                                                      | <b>Prerandomization</b> |                 |    | <b>Randomization</b> |   |    |    |    |    |    |    |    |    |    |    |    |    |    |                               |                    |   |
| <b>Period</b>                                                     | <b>Screening</b>        | <b>Baseline</b> |    | <b>Treatment</b>     |   |    |    |    |    |    |    |    |    |    |    |    |    |    |                               |                    |   |
| <b>Visit</b>                                                      | 1                       | 2               | 3  | 4                    | 5 | 6  | 7  | 8  | 9  | 10 | 11 | 12 | 13 | 14 | 15 | 16 | 17 | 18 | 19 (Final / Early Withdrawal) | <b>Unscheduled</b> |   |
| <b>Day</b>                                                        | -60 to -5               | -2              | -1 | 1/2                  | 7 | 14 | 21 | 28 | 35 | 42 | 49 | 56 | 63 | 70 | 77 | 84 | 85 | 98 | 175                           |                    |   |
| <b>Procedures / Assessments</b>                                   |                         |                 |    |                      |   |    |    |    |    |    |    |    |    |    |    |    |    |    |                               |                    |   |
| <b>Randomization</b>                                              |                         |                 | X  |                      |   |    |    |    |    |    |    |    |    |    |    |    |    |    |                               |                    |   |
| <b>MRI</b>                                                        | X                       |                 |    |                      |   |    | X  |    |    |    | X  |    |    |    | X  |    |    |    | X                             | X                  |   |
| <b>Vital signs</b>                                                | X                       | X               | X  | X                    | X | X  | X  | X  | X  | X  | X  | X  | X  | X  | X  | X  | X  | X  | X                             | X                  | X |
| <b>Physical exam</b>                                              | X                       | X               |    | X                    | X | X  | X  | X  | X  | X  | X  | X  | X  | X  | X  | X  |    | X  | X                             |                    |   |
| <b>ECG</b>                                                        | X                       | X               |    | X                    |   | X  |    | X  |    | X  |    | X  |    | X  |    | X  | X  | X  | X                             | X                  |   |
| <b>Clinical labs (hematology, clinical chemistry, urinalysis)</b> | X                       |                 | X  | X                    |   | X  |    | X  |    | X  |    | X  |    | X  |    | X  | X  | X  | X                             | X                  |   |
| <b>C-SSRS</b>                                                     | X                       | X               |    | X                    |   | X  |    | X  |    | X  |    | X  |    | X  |    | X  | X  | X  | X                             | X                  |   |
| <b>Adverse events</b>                                             | X                       | X               | X  | X                    | X | X  | X  | X  | X  | X  | X  | X  | X  | X  | X  | X  | X  | X  | X                             | X                  | X |
